# Supplementary material for: Selenium Status in Patients with Chronic Liver Disease: A Systematic Review and Meta-Analysis
Source: MDPI journal article supplement (doi:10.3390/nu14050952), 2022-02-23
Supplement: s1 [file s1]

**Supplementary Table S1. Initial Search Strategies**

|                                                                                                                                                                                                                                                                                                                                                                                                                                                                                |
|--------------------------------------------------------------------------------------------------------------------------------------------------------------------------------------------------------------------------------------------------------------------------------------------------------------------------------------------------------------------------------------------------------------------------------------------------------------------------------|
| <b>Search 1: PubMed, search through April 28, 2021 (n= 1031)</b>                                                                                                                                                                                                                                                                                                                                                                                                               |
| Search 1: (((selen*[Title/Abstract]) OR selenium [Title/Abstract]) OR selenium [MeSH Terms])) AND (((((liver [Title/Abstract]) OR hepat*[Title/Abstract]) OR liver diseases [Title/Abstract]) OR liver [MeSH Terms])) AND (((((((epidemiology [Title/Abstract]) OR epidemiology*[MeSH Terms]) OR mortality* [Title/Abstract]) OR mortality*[MeSH Terms]) OR morbidity* [Title/Abstract]) OR morbidity[MeSH Terms]) OR incidence* [Title/Abstract]) OR incidence [MeSH Terms])) |
| <b>Search 2: Embase, search through April 28, 2021 (n= 1154)</b>                                                                                                                                                                                                                                                                                                                                                                                                               |
| ((('selenium':ab,ti) OR (selen*:ab,ti) OR ('selenium'/exp)) AND (('liver':ab,ti) OR (hepat*':ab,ti) OR ('liver diseases':ab,ti) OR ('liver'/exp))) AND (((('epidemiology':ab,ti) OR (mortality:ab,ti) OR ('epidemiology'/exp)) AND (('morbidity':ab,ti) AND ('incidence':ab,ti)))                                                                                                                                                                                              |
| <b>Search 3: Cochrane Library, search through April 28, 2021 (n= 34)</b>                                                                                                                                                                                                                                                                                                                                                                                                       |
| ((selenium):ti,ab,kw) OR ((selen*):ti,ab,kw) OR ([selenium] explode all trees)) AND (((liver):ti,ab,kw) OR ((liver diseases):ti,ab,kw) OR                                                                                                                                                                                                                                                                                                                                      |

((hepat\*):ti,ab,kw) OR ((([liver] explode all trees))) OR ((([epidemiology] explode all trees) OR ([mortality] explode all trees) OR ([morbidity] explode all trees)) AND ([incidence] explode all trees) OR ((epidemiology):ti,ab,kw) OR ((mortality):ti,ab,kw) OR (morbidity):ti,ab,kw)) OR (incidence):ti,ab,kw))

**Search 4: Web of science, search through April 28, 2021 (n= 4)**

((selen\* ) AND ((liver diseases OR (disease, liver) OR (hepat\*) AND (epidemiology\*) OR (mortality\*) OR (morbidity\*) OR (incidence\*)))

**Supplementary Table S2. Characteristics of studies included in the meta-analysis**

| Study; Age group      | Continent | Study Design | Sample Source | Case, n | Liver Progression             | Mean $\pm$ SD                                | Control, n | Mean $\pm$ SD                         | Quality Score (NOS) |
|-----------------------|-----------|--------------|---------------|---------|-------------------------------|----------------------------------------------|------------|---------------------------------------|---------------------|
| Shamberge 1973; Adult | USA       | Case-control | Blood         | 14      | Liver cancer                  | 150 $\pm$ 26.3 $\mu$ g/L                     | 48         | 229 $\pm$ 35.2 $\mu$ g/L              | Serious (9)         |
|                       |           |              |               | 6       | Other cirrhosis               | 136 $\pm$ 24.2 $\mu$ g/L                     |            |                                       |                     |
|                       |           |              |               | 3       | Other hepatitis               | 145 $\pm$ 16.8 $\mu$ g/L                     |            |                                       |                     |
| Burch 1978; Adult     | USA       | Case-control | Serum         | 8       | Other cirrhosis               | 100 $\pm$ 9 $\mu$ g/L                        | 13         | 120 $\pm$ 6 $\mu$ g/L                 | Serious (9)         |
| Sullivan 1979; Adult  | USA       | Case-control | Serum         | 14      | Other cirrhosis               | 90 $\pm$ 20 $\mu$ g/L                        | 37         | 120 $\pm$ 10 $\mu$ g/L                | Serious (9)         |
| Aaseth 1980 ; Adult   | Europe    | Case-control | Serum         | 11      | Alcoholic cirrhosis           | 50.5 $\pm$ 15.8 $\mu$ g/L <sup>1</sup>       | 40         | 121 $\pm$ 19.7 $\mu$ g/L <sup>1</sup> | Serious (8)         |
| Aaseth 1982; Adult    | Europe    | Case-control | Serum         | 11      | Alcoholic cirrhosis           | 95.6 $\pm$ 38.7 $\mu$ g /L <sup>1</sup>      | 40         | 121 $\pm$ 19.7 $\mu$ g/L <sup>1</sup> | Serious (9)         |
|                       |           |              |               | 12      | Primary cirrhosis             | 108 $\pm$ 15.0 $\mu$ g/L <sup>1</sup>        |            |                                       |                     |
|                       |           |              |               | 12      | Other cirrhosis               | 96.3 $\pm$ 21.3 $\mu$ g/L <sup>1</sup>       |            |                                       |                     |
|                       |           |              |               | 15      | Viral hepatitis               | 88.4 $\pm$ 21.3 $\mu$ g/L <sup>1</sup> (HBV) |            |                                       |                     |
|                       |           |              |               | 4       | Viral hepatitis               | 94.8 $\pm$ 40.3 $\mu$ g/L <sup>1</sup> (HCV) |            |                                       |                     |
| Välimäki 1983; Adult  | Europe    | Case-control | Serum         | 13      | Alcoholic cirrhosis           | 43.3 $\pm$ 13.4 $\mu$ g/L                    | 45         | 83.1 $\pm$ 15.7 $\mu$ g/L             | Serious (9)         |
|                       |           |              |               | 17      | Primary cirrhosis             | 47.3 $\pm$ 7.9 $\mu$ g/L                     |            |                                       |                     |
| Korpela 1985; Adult   | Europe    | Case-control | Serum         | 11      | Alcoholic fatty liver disease | 55.8 $\pm$ 21.2 $\mu$ g/L                    | 25         | 88.7 $\pm$ 11.0 $\mu$ g/L             | Serious (9)         |
|                       |           |              |               | 6       | Alcoholic hepatitis           | 46.0 $\pm$ 14.1 $\mu$ g/L                    |            |                                       |                     |
|                       |           |              |               | 22      | Alcoholic cirrhosis           | 41.1 $\pm$ 12.8 $\mu$ g/L                    |            |                                       |                     |

|                       |        |              |        |    |                               |                                          |    |                                |                |
|-----------------------|--------|--------------|--------|----|-------------------------------|------------------------------------------|----|--------------------------------|----------------|
| Milman 1986; Adult    | Europe | Case-control | Liver  | 14 | Alcoholic cirrhosis           | 316 ± 158 µg/kg <sup>1</sup>             | 74 | 2210 ± 395 µg/kg <sup>1</sup>  | Serious<br>(9) |
|                       |        |              |        | 13 | Primary cirrhosis             | 8690 ± 474 µg/kg <sup>1</sup>            |    |                                |                |
| Sharda 1986; Children | Asia   | Case-control | Liver  | 20 | Other cirrhosis               | 160 ± 10 µg/kg <sup>1</sup>              | 20 | 100 ± 10 µg/kg <sup>1</sup>    | Serious<br>(9) |
|                       |        |              | Hair   | 20 | Other cirrhosis               | 400 ± 80 µg/kg <sup>1</sup>              | 20 | 500 ± 60 µg/kg <sup>1</sup>    |                |
|                       |        |              | Nail   | 20 | Other cirrhosis               | 1000 ± 40 µg/kg <sup>1</sup>             | 20 | 700 ± 50 µg/kg <sup>1</sup>    |                |
| Johansson 1986; Adult | Europe | Case-control | Plasma | 21 | Alcoholic cirrhosis           | 58.4 ± 11.1 µg/L <sup>1</sup>            | 16 | 79.8 ± 11.1 µg/L <sup>1</sup>  | Serious<br>(1) |
|                       |        |              | Blood  | 21 | Alcoholic cirrhosis           | 68.7 ± 12.6 µg/L <sup>1</sup>            | 16 | 94.0 ± 18.2 µg/L <sup>1</sup>  |                |
|                       |        |              | Plasma | 15 | Alcoholic hepatitis           | 78.2 ± 19.7 µg/L <sup>1</sup>            | 16 | 79.8 ± 11.1 µg/L <sup>1</sup>  |                |
| Corrocher 1986; Adult | Europe | Case-control | Serum  | 12 | Liver cancer                  | 84.5 ± 32.4 µg/L <sup>1</sup>            | 8  | 126.4 ± 8.7 µg/L <sup>1</sup>  | Serious<br>(9) |
| Dworkin 1988; Adult   | USA    | Case-control | liver  | 12 | Alcoholic cirrhosis           | 731 ± 77 µg/kg <sup>1</sup>              | 13 | 1310 ± 166 µg/kg <sup>1</sup>  | Serious<br>(8) |
| Casariil 1989; Adult  | Europe | Case-control | Serum  | 55 | Other cirrhosis               | 45.0 ± 15.8 µg/L <sup>1</sup>            | 47 | 72.7 ± 12.6 µg/L <sup>1</sup>  | Serious<br>(9) |
| Välimäki 1991; Adult  | Europe | Case-control | Blood  | 8  | Primary cirrhosis             | 288 ± 15.0 µg/L <sup>1</sup>             | 8  | 318 ± 17.4 µg/L <sup>1</sup>   | Serious<br>(9) |
| Ward 1992; Adult      | Europe | Case-control | Plasma | 11 | Alcoholic fatty liver disease | 77.4 ± 49.0 µg/L <sup>1</sup>            | 10 | 109.9 ± 34.0 µg/L <sup>1</sup> | Serious<br>(7) |
|                       |        |              |        | 5  | Alcoholic cirrhosis           | 62.4 ± 29.2 µg/L <sup>1</sup> (P-Ch A-B) |    |                                |                |
|                       |        |              |        | 4  | Alcoholic cirrhosis           | 61.6 ± 16.6 µg/L <sup>1</sup> P-Ch C)    |    |                                |                |
| Thuluvath 1992; Adult | Europe | Case-control | Serum  | 51 | Alcoholic cirrhosis           | 63.6 ± 18.2 µg/L                         | 56 | 87.8 ± 21.1 µg/L               | Serious<br>(9) |
|                       |        |              |        | 45 | Primary cirrhosis             | 60.6 ± 13.6 µg/L                         |    |                                |                |
|                       |        |              |        | 8  | Other cirrhosis               | 59.3 ± 13.3 µg/L                         |    |                                |                |

|                       |        |              |        |     |                     |                                             |     |                               |                 |
|-----------------------|--------|--------------|--------|-----|---------------------|---------------------------------------------|-----|-------------------------------|-----------------|
|                       |        |              |        | 19  | Other hepatitis     | 73.9 ± 20.3 µg/L                            |     |                               |                 |
|                       |        |              |        | 9   | Viral hepatitis     | 65.4 ± 19.0 µg/L                            |     |                               |                 |
|                       |        |              |        | 17  | Liver cancer        | 76.8 ± 18.3 µg/L                            |     |                               |                 |
| Gerli 1992; Adult     | Europe | Case-control | Serum  | 21  | Alcoholic hepatitis | 67.1 ± 18.2 µg/L <sup>1</sup> (             | 50  | 75.0 ± 15.0 µg/L <sup>1</sup> | Serious<br>(9)  |
|                       |        |              |        | 22  | Alcoholic cirrhosis | 67.1 ± 15.8 µg/L <sup>1</sup> (P-Ch A)      |     |                               |                 |
|                       |        |              |        | 30  | Alcoholic cirrhosis | 56.1 ± 19.7 µg/L <sup>1</sup> (P-Ch B)      |     |                               |                 |
|                       |        |              |        | 21  | Alcoholic cirrhosis | 48.2 ± 10.3 µg/L <sup>1</sup> (P-Ch C)      |     |                               |                 |
| Buljevac 1996; Adult  | Europe | Case-control | Serum  | 49  | Liver cirrhosis     | 39.0± 14.0 µg/L <sup>1</sup>                | 202 | 66.8 ± 9.13 µg/L <sup>1</sup> | Serious<br>(7)  |
|                       |        |              |        | 10  | Liver cancer        | 42.0 ± 10.6 µg/L <sup>1</sup>               |     |                               |                 |
| Loguercio 1997; Adult | Europe | Case-control | Plasma | 8   | Viral hepatitis     | 120 ± 30 µg/L <sup>1</sup>                  | 10  | 100 ± 10 µg/L                 | Moderate<br>(6) |
|                       |        |              |        | 18  | Primary cirrhosis   | 70 ± 10 µg/L <sup>1</sup><br>malnourished   |     |                               |                 |
|                       |        |              |        | 18  | Primary cirrhosis   | 70 ± 10 µg/L <sup>1</sup><br>malnourished   |     |                               |                 |
|                       |        |              | Blood  | 8   | Viral hepatitis     | 140 ± 20 µg/L <sup>1</sup>                  | 10  | 180 ± 30 µg/L <sup>1</sup>    |                 |
|                       |        |              |        | 18  | Primary cirrhosis   | 100 ± 10 µg/L <sup>1</sup><br>malnourished  |     |                               |                 |
|                       |        |              |        | 14  | Primary cirrhosis   | 90 ± 10 µg/L <sup>1</sup><br>Well-nourished |     |                               |                 |
| Guarini 1998; Adult   | Europe | Case-control | Serum  | 20  | Alcoholic cirrhosis | 75.0 ± 15.0 µg/L <sup>1</sup>               | 40  | 94.0 ± 15.8 µg/L <sup>1</sup> | Serious<br>(9)  |
|                       |        |              |        | 13  | Other cirrhosis     | 75.8 ± 27.6 µg/L <sup>1</sup>               |     |                               |                 |
| Yu 1999; Adult        | Asia   | Cohort study | Plasma | 139 | Viral hepatitis     | 145 ± 37.6 µg/L                             | 138 | 151 ± 35.2 µg/L               | Serious<br>(9)  |
|                       |        |              |        | 69  | Liver cancer        | 132± 30.9 µg/L                              |     |                               |                 |

|                             |        |                   |        |     |                     |                                              |     |                               |                          |
|-----------------------------|--------|-------------------|--------|-----|---------------------|----------------------------------------------|-----|-------------------------------|--------------------------|
| Navarro-Alarcón 2002; Adult | Europe | Cross-section     | Serum  | 12  | Other cirrhosis     | 41.0 ± 12.4 µg/L                             | 130 | 74.9 ± 27.3 µg/L              | Serious <sup>3</sup> (7) |
|                             |        |                   |        | 38  | Viral hepatitis     | 52.4 ± 15.6 µg/L                             |     |                               |                          |
| Chin-Thin 2002; Adult       | Asia   | Case-control      | Blood  | 51  | Liver cancer        | 180 ± 20 µg/L <sup>1</sup>                   | 50  | 280 ± 60 µg/L <sup>1</sup>    | Serious (9)              |
| Czuczejko 2003; Adult       | Europe | Case-control      | Blood  | 23  | Viral hepatitis     | 58.6 ± 13.3 µg/L <sup>1</sup> (ALT ≤ 40 U/L) | 50  | 89.5 ± 15.6 µg/L <sup>1</sup> | Serious (9)              |
|                             |        |                   |        | 36  | Viral hepatitis     | 74.3 ± 15.0 µg/L <sup>1</sup> (ALT ≥ 40 U/L) |     |                               |                          |
|                             |        |                   | Plasma | 23  | Viral hepatitis     | 43.6 ± 12.1 µg/L <sup>1</sup> (ALT ≤ 40 U/L) | 50  | 67.4 ± 11.7 µg/L <sup>1</sup> |                          |
|                             |        |                   |        | 36  | Viral hepatitis     | 53.7 ± 11.6 µg/L <sup>1</sup> (ALT ≥ 40 U/L) |     |                               |                          |
|                             |        |                   | Blood  | 26  | Other cirrhosis     | 52.5 ± 15.7 µg/L <sup>1</sup> (ALT ≤ 40 U/L) | 50  | 89.5 ± 15.6 µg/L <sup>1</sup> |                          |
|                             |        |                   |        | 38  | Other cirrhosis     | 64.4 ± 17.5 µg/L <sup>1</sup> (ALT ≥ 40 U/L) |     |                               |                          |
|                             |        |                   | Plasma | 26  | Other cirrhosis     | 37.4 ± 11.6 µg/L <sup>1</sup> (ALT ≤ 40 U/L) | 50  | 67.4 ± 11.7 µg/L <sup>1</sup> |                          |
|                             |        |                   |        | 38  | Other cirrhosis     | 48.7 ± 15.0 µg/L <sup>1</sup> (ALT ≥ 40 U/L) |     |                               |                          |
| Sakoda 2005; Adult          | Asia   | Nest case control | Nail   | 166 | Liver cancer        | 3.1 ± 1.5 ppm                                | 394 | 3.5 ± 0.45 ppm                | Serious (10)             |
| Pemberton 2005; Adult       | Europe | Case-control      | Serum  | 24  | Alcoholic cirrhosis | 46.2 ± 7.2 µg/L <sup>1</sup>                 | 49  | 101 ± 3.28 µg/L <sup>1</sup>  | Serious (9)              |
| Ko 2005; Adult              | Asia   | Cohort study      | Plasma | 33  | Viral hepatitis     | 159 ± 5.3 µg/L                               | 31  | 217 ± 7.44 µg/L               | Serious                  |

|                              |        |               |        |    |                     |                                                     |    |                               |                             |
|------------------------------|--------|---------------|--------|----|---------------------|-----------------------------------------------------|----|-------------------------------|-----------------------------|
|                              |        |               | Blood  | 33 | Viral hepatitis     | 55.1 ± 3.79 µg/L                                    | 31 | 139 ± 5.76 µg/L               | (9)                         |
| Sayed 2005; Adult            | Africa | Cross-section | Blood  | 25 | Viral hepatitis     | 154 ± 12.8 µg/L <sup>1</sup> (HBsAg positive)       | 41 | 166 ± 23.5 µg/L <sup>1</sup>  | Serious <sup>3</sup><br>(8) |
|                              |        |               |        | 12 | Viral hepatitis     | 154 ± 12.1 µg/L <sup>1</sup> (Anti-HCV Ab positive) |    |                               |                             |
|                              |        |               |        | 6  | Viral hepatitis     | 158 ± 6.6 µg/L <sup>1</sup> (Combined infection)    |    |                               |                             |
| Lin 2006; Adult              | Asia   | Case-control  | Blood  | 40 | Viral hepatitis     | 124 ± 20.4 µg/L (HBV carriers)                      | 50 | 129 ± 21.5 µg/L               | Serious<br>(8)              |
|                              |        |               |        | 50 | Viral hepatitis     | 124 ± 22.6 µg/L (HBV)                               |    |                               |                             |
|                              |        |               |        | 18 | Liver cancer        | 109 ± 21.8 µg/L                                     |    |                               |                             |
|                              |        |               |        | 20 | Other cirrhosis     | 118 ± 25.3 µg/L                                     |    |                               |                             |
| Váli 2008; Adult             | Europe | Case-control  | Blood  | 11 | Liver cancer        | 314 ± 83.7 µg/kg (Benign)                           | 30 | 301 ± 57.2 µg/kg              | Serious<br>(8)              |
|                              |        |               |        | 23 | Liver cancer        | 129 ± 58.3 µg/kg (HCC)                              |    |                               |                             |
| González-Reimers 2009; Adult | Europe | Case-control  | Serum  | 9  | Viral hepatitis     | 81.3 ± 10.1 µg/L (HCV)                              | 20 | 82.1 ± 9.1 µg/L               | Serious<br>(9)              |
|                              |        |               |        | 12 | Viral hepatitis     | 73.4 ± 14.5 µg/L (HCV patient drink)                |    |                               |                             |
|                              |        |               |        | 19 | Alcoholic hepatitis | 70.0 ± 14.0 µg/L                                    |    |                               |                             |
| Balamtekin 2010; children    | Asia   | RCT           | Plasma | 35 | Viral hepatitis     | 18.4 ± 9.06 µg/L <sup>1</sup>                       | 27 | 44.7 ± 10.2 µg/L <sup>1</sup> | Serious <sup>2</sup><br>(9) |
| Martínez-Peinado 2010; Adult | Europe | Case-control  | Blood  | 93 | Other cirrhosis     | 56.9 ± 18.9 µg/L <sup>1</sup>                       | 30 | 73.1 ± 19.0 µg/L <sup>1</sup> | Serious<br>(9)              |
| Uslu 2010; children          | Asia   | Case-control  | Serum  | 38 | Other cirrhosis     | 42.4 ± 8.2 µg/L                                     | 41 | 64.4 ± 16.9 µg/L              | Serious<br>(7)              |

|                     |      |              |       |    |                 |                                                |    |                               |                             |
|---------------------|------|--------------|-------|----|-----------------|------------------------------------------------|----|-------------------------------|-----------------------------|
| Himoto 2011; adult  | Asia | Case-control | Serum | 10 | Viral hepatitis | 125 ± 24 µg/L <sup>1</sup> (HCV F3)            | 11 | 148 ± 16 µg/L <sup>1</sup>    | Serious<br>(9)              |
|                     |      |              |       | 10 | Viral hepatitis | 113 ± 13 µg/L <sup>1</sup> (HCV F4)            |    |                               |                             |
| Khan 2012; Adult    | Asia | Case-control | Blood | 5  | Viral hepatitis | 138 ± 0.36 µg/L (HBV female)                   | 10 | 199 ± 104 µg/L                | Serious<br>(9)              |
|                     |      |              |       | 36 | Viral hepatitis | 77.4 ± 0.47 µg/L (HBV male)                    |    |                               |                             |
|                     |      |              |       | 38 | Viral hepatitis | 107.5 ± 0.44 µg/L (HCV female)                 | 16 | 214 ± 164 µg/L                |                             |
|                     |      |              |       | 71 | Viral hepatitis | 101.6 ± 0.55 µg/L (HCV male)                   |    |                               |                             |
| Kolachi 2012; Adult | Asia | RCT          | Hair  | 26 | Other cirrhosis | 680 ± 310 µg/kg <sup>1</sup> (20-45 years old) | 43 | 1280 ± 250 µg/kg <sup>1</sup> | Serious <sup>2</sup><br>(4) |
|                     |      |              |       | 52 | Liver cancer    | 660 ± 140 µg/kg <sup>1</sup> (20-45 years old) |    |                               |                             |
|                     |      |              |       | 14 | Other cirrhosis | 710 ± 410 µg/kg <sup>1</sup> (46-60 years old) | 32 | 1290 ± 430 µg/kg <sup>1</sup> |                             |
|                     |      |              |       | 40 | Liver cancer    | 690 ± 380 µg/kg <sup>1</sup> (46-60 years old) |    |                               |                             |
|                     |      |              | Serum | 26 | Other cirrhosis | 48.5 ± 6.90 µg/L (20-45 years old)             | 43 | 69.6 ± 11.2 µg/L              |                             |
|                     |      |              |       | 52 | Liver cancer    | 44.8 ± 2.84 µg/L (20-45 years old)             |    |                               |                             |
|                     |      |              |       | 14 | Other cirrhosis | 45.8 ± 8.90 µg/L (46-60 years old)             | 32 | 75.7 ± 8.90 µg/L              |                             |
|                     |      |              |       | 40 | Liver cancer    | 43.1 ± 3.85 µg/L (46-60 years old)             |    |                               |                             |



|                       |        |              |        |    |                            |                                                |     |                              |                             |
|-----------------------|--------|--------------|--------|----|----------------------------|------------------------------------------------|-----|------------------------------|-----------------------------|
|                       |        |              |        |    |                            | years old)                                     |     |                              |                             |
|                       |        |              | Blood  | 26 | Other cirrhosis            | 114 ± 6.32 μg/L (20-45 years old)              | 43  | 175 ± 7.41 μg/L              |                             |
|                       |        |              |        | 52 | Liver cancer               | 104 ± 7.83 μg/L (20-45 years old)              |     |                              |                             |
|                       |        |              |        | 14 | Other cirrhosis            | 99.8 ± 10.2 μg/L (46-60 years old)             | 32  | 163 ± 7.82 μg/L              |                             |
|                       |        |              |        | 40 | Liver cancer               | 97.7 ± 6.38 μg/L (46-60 years old)             |     |                              |                             |
| Kazi 2012; adult      | Asia   | RCT          | Serum  | 31 | Liver cancer               | 36.2 ± 3.95 μg/L                               | 120 | 77.0 ± 13.5 μg/L             | Serious <sup>2</sup><br>(4) |
|                       |        |              |        | 41 | Other cirrhosis            | 41.8 ± 12.5 μg/L                               |     |                              |                             |
|                       |        |              | Blood  | 31 | Liver cancer               | 63.5 ± 9.22 μg/L                               | 120 | 180 ± 6.83 μg/L              |                             |
|                       |        |              |        | 41 | Other cirrhosis            | 112 ± 8.97 μg/L                                |     |                              |                             |
| Bettinger 2013; Adult | Europe | Case-control | Plasma | 12 | Viral hepatitis            | 84.7 ± 16.4 μg/L                               | 10  | 118 ± 15.7 μg/L              | Serious<br>(9)              |
|                       |        |              |        | 10 | Liver cancer               | 85 ± 11.5 μg/L                                 |     |                              |                             |
|                       |        |              |        | 10 | Other cirrhosis            | 99.8 ± 11 μg/L                                 |     |                              |                             |
| Pan 2013; Adult       | Asia   | Case-control | Hair   | 15 | Alcoholic hepatitis        | 450 ± 130 μg/kg <sup>1</sup> (15-25 years old) | 18  | 680 ± 180 μg/kg <sup>1</sup> | Serious<br>(9)              |
|                       |        |              |        | 12 | Simple fatty liver disease | 560 ± 170 μg/kg <sup>1</sup> (15-25 years old) |     |                              |                             |
|                       |        |              |        | 30 | Alcoholic hepatitis        | 470 ± 130 μg/kg <sup>1</sup> (26-35 years old) | 34  | 620 ± 160 μg/kg <sup>1</sup> |                             |
|                       |        |              |        | 18 | Simple fatty liver disease | 560 ± 140 μg/kg <sup>1</sup> (26-35 years old) |     |                              |                             |

|                      |        |               |       |      |                            |                                                |      |                                |                          |
|----------------------|--------|---------------|-------|------|----------------------------|------------------------------------------------|------|--------------------------------|--------------------------|
|                      |        |               |       | 18   | Alcoholic hepatitis        | 310 ± 90 µg/kg <sup>1</sup> (36-45 years old)  | 16   | 500 ± 110 µg/kg <sup>1</sup>   |                          |
|                      |        |               |       | 6    | Simple fatty liver disease | 420 ± 110 µg/kg <sup>1</sup> (36-45 years old) |      |                                |                          |
|                      |        |               |       | 15   | Alcoholic hepatitis        | 340 ± 80 µg/kg <sup>1</sup> (46-55 years old)  | 10   | 410 ± 80 µg/kg <sup>1</sup>    |                          |
|                      |        |               |       | 4    | Simple fatty liver disease | 390 ± 70 µg/kg <sup>1</sup> (46-55 years old)  |      |                                |                          |
| Kolachi 2013; Adult  | Asia   | RCT           | Blood | 132  | Viral hepatitis            | 107 ± 5.56 µg/L (Certified Value)              | 128  | 172 ± 5.43 µg/L                | Serious <sup>2</sup> (4) |
|                      |        |               | Serum | 132  | Viral hepatitis            | 51.6 ± 2.66 µg/L (Measured Value)              | 128  | 68.4 ± 6.12 µg/L               |                          |
| Nangliya 2015; Adult | Asia   | Cross-section | Serum | 150  | Other cirrhosis            | 70.8 ± 15.3 µg/L <sup>1</sup>                  | 50   | 124.7 ± 16.6 µg/L <sup>1</sup> | Serious <sup>3</sup> (7) |
| Hughes 2016; Adult   | Europe | Cohort study  | Blood | 40   | Liver cancer               | 82.3 ± 18.3 µg/L (HCC)                         | 40   | 87.5 ± 15.1 µg/L               | Serious (9)              |
|                      |        |               |       | 100  | Liver cancer               | 82.1 ± 8.17 µg/L (GBTC)                        | 100  | 85.9 ± 9.77 µg/L               |                          |
|                      |        |               |       | 121  | Liver cancer               | 71.3 ± 5.77 µg/L (IHBC)                        | 121  | 85.2 ± 10.4 µg/L               |                          |
| Yang 2016; Adult     | Asia   | Cross-section | Blood | 3732 | NAFLD                      | 270 ± 5.35 µg/L                                | 5118 | 192 ± 3.60 µg/L                | Serious <sup>3</sup> (8) |
| Prystupa 2017; Adult | Europe | case-control  | Blood | 29   | Alcoholic cirrhosis        | 68 ± 14 µg/L <sup>1</sup> (P-Ch A)             | 20   | 100 ± 13 µg/L <sup>1</sup>     | Serious (9)              |
|                      |        |               |       | 36   | Alcoholic cirrhosis        | 85 ± 16 µg/L <sup>1</sup> (P-Ch B)             |      |                                |                          |
|                      |        |               |       | 34   | Alcoholic cirrhosis        | 72 ± 17 µg/L <sup>1</sup> (P-Ch C)             |      |                                |                          |
| Dhanda 2020; Adult   | Europe | Cohort study  | Serum | 302  | Alcoholic hepatitis        | 47.4 ± 23.7 µg/L <sup>1</sup>                  | 15   | 103 ± 15.8 µg/L <sup>1</sup>   | Serious (9)              |
|                      |        |               |       | 11   | Other cirrhosis            | 63.2 ± 31.6 µg/L <sup>1</sup>                  |      |                                |                          |

|                  |      |               |       |      |              |                                                    |      |                 |                             |
|------------------|------|---------------|-------|------|--------------|----------------------------------------------------|------|-----------------|-----------------------------|
| Fu 2020; Adult   | Asia | Case-control  | Serum | 105  | Liver cancer | 88.3 ± 20.6 µg/L                                   | 105  | 167 ± 38.9 µg/L | Serious<br>(9)              |
| Li 2020; Adult   | Asia | Cross-section | Blood | 144  | NAFLD        | 157 ± 6.95 µg/L (from<br>Longitudinal analysis)    | 522  | 159 ± 8.33 µg/L | Serious <sup>3</sup><br>(7) |
|                  |      |               |       | 330  | NAFLD        | 157 ± 8.04 µg/L (from<br>Cross-sectional analysis) | 1264 | 156 ± 7.69 µg/L |                             |
| Wang 2021; Adult | USA  | Cross-section | Serum | 1319 | NAFLD        | 129 ± 40.0 µg/L                                    | 2508 | 127 ± 40.0 µg/L | Serious <sup>3</sup><br>(8) |

NAFLD: non-alcoholic fatty liver, HBV: hepatitis B virus, HCV: hepatitis C virus, SD: standard deviation, HCC: Hepatocellular carcinoma ; GBTC: Biliary tract cancer, IHBC: Intrahepatic bile duct cancer, P-Ch: Child-Pugh , ALT: alanine transaminase,

<sup>1</sup> the data were converted to µg/L or µg/kg for consistency.

<sup>2</sup> the quality score measured by Jadad scale, the score  $\geq 4$  means that the quality of this study is serious

<sup>3</sup> the quality score measured by AHRQ scale, the score  $\geq 7$  means that the quality of this study is serious
